# Supplementary material for: Aggregation-induced emission in precursors to porous molecular crystals
Source: Royal Society of Chemistry journal article supplement (doi:10.1039/c7cc03814c), 2017-01-01
Supplement: c7cc03814c1.pdf [file c7cc03814c1.pdf]

# Aggregation-Induced Emission of Precursors to Porous Molecular Crystals

Zhenglin Zhang, Mohamed I. Hashim and Ognjen Š. Miljanić\*

Department of Chemistry, University of Houston, 112 Fleming Building, Houston, Texas 77204-5003, United States

Email: miljanic@uh.edu

Phone: +1.832.842.8827

Web: www.miljanicgroup.com

---

## Supporting Information

|                                                                                    |            |
|------------------------------------------------------------------------------------|------------|
| <b>General Methods and Materials .....</b>                                         | <b>S2</b>  |
| <b>Synthesis of Compound 1 .....</b>                                               | <b>S3</b>  |
| <b><sup>1</sup>H and <sup>19</sup>F NMR Spectra of Synthesized Compounds .....</b> | <b>S6</b>  |
| <b>X-ray Crystallographic Analysis of Compound 1 .....</b>                         | <b>S10</b> |
| <b>Spectroscopic Experiments .....</b>                                             | <b>S11</b> |
| <b>Theoretical Calculations.....</b>                                               | <b>S12</b> |
| <b>Variable Temperature <sup>19</sup>F NMR Studies.....</b>                        | <b>S16</b> |
| <b>References.....</b>                                                             | <b>S19</b> |

## General Methods and Materials

Schlenk flasks or vials with PTFE/Liner caps were used as reaction vessels for the synthesis of precursors, while standard scintillation bottles were used as vessels for the synthesis of compound **1**. Column chromatography was carried out on silica gel 60, 32–63 mesh and basic aluminum oxide Act. 1, 50–200  $\mu\text{m}$  (Sorbent Technologies). Analytical TLC was performed on J. T. Baker plastic-backed silica gel IB-F plates and aluminum oxide IB-F plates. The  $^1\text{H}$  and  $^{19}\text{F}$  NMR spectra were recorded on JEOL ECA-600, ECA-500, or ECX-400P spectrometers using the peaks of tetramethylsilane or residual solvent as standards. Trifluorotoluene ( $\text{PhCF}_3$ ,  $\delta = -63.72$  ppm) was used as the internal standard in  $^{19}\text{F}$  NMR spectra.  $^{13}\text{C}$  NMR spectra were not included since they are not informative, due to the poor solubility of the prepared compounds and extensive coupling between  $^{13}\text{C}$  and  $^{19}\text{F}$  nuclei; low intensities and many missing peaks were observed. Analytical thin-layer chromatography was performed on Fluka silica gel/TLC plates with a fluorescent indicator that emitted when irradiated at 254 nm.

All reactions were performed under nitrogen atmosphere in oven-dried glassware. The following starting materials and solvents were obtained from the respective commercial sources and used without further purification:  $\text{Boc}_2\text{O}$  (Alfa Aesar); triphenylchloromethane ( $\text{TrCl}$ , AK Scientific);  $N,N$ -dimethylacetamide (DMA),  $N,N$ -dimethylformamide (DMF), and potassium  $t$ -butoxide ( $t$ -BuOK) (Sigma Aldrich); 2,3,5,6-tetrafluorobenzene (Synquest); triethylamine ( $\text{Et}_3\text{N}$ ), tetrakis(triphenylphosphine)palladium(0) ( $\text{Pd}(\text{PPh}_3)_4$ ), 4-iodopyrazole and trifluoroacetic acid (TFA) (Matrix Scientific); methanol, ethanol, dichloromethane, chloroform, (Sigma Aldrich); water (Milli-Q, deionized). Compound **2** was prepared as previously reported.

*Experiments are presented in the order following the discussion of the manuscript.*

*Compound numbers are identical to those in the main text of the manuscript.*

## Synthesis of Compound 1

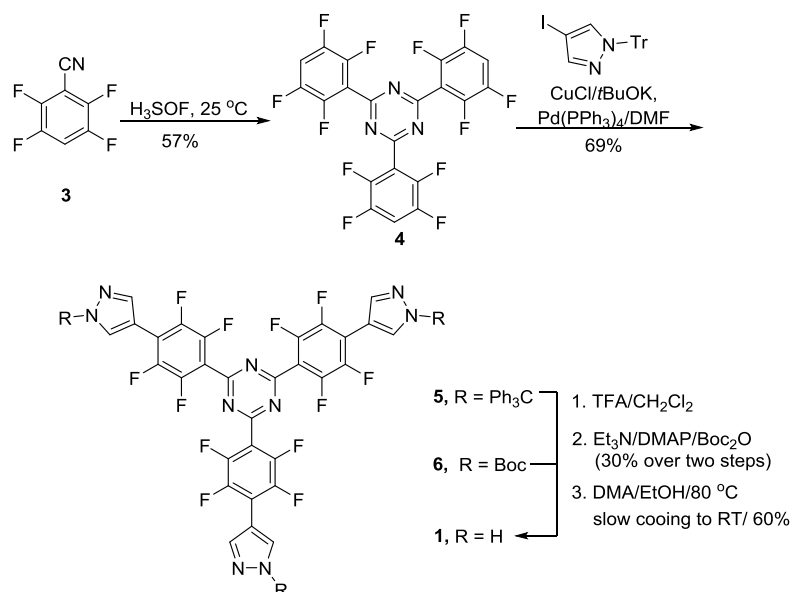

Synthesis of 2,4,6-tris(2,3,5,6-tetrafluorophenyl)-1,3,5-triazine (**4**): Compound 2,3,5,6-tetrafluorobenzonitrile<sup>1</sup> (6.00 g, 34 mmol) and fluorosulfuric acid (5.6 mL, 103 mmol) were placed in a 20 mL Schlenk flask with stirring at room temperature for 3 d. The mixture was poured into cold water with ice (30 mL) and the precipitated solid was collected, washed with  $\text{H}_2\text{O}$  until neutral, EtOH (15 mL), and Et<sub>2</sub>O (2 × 5 mL) and air dried for 12 hours. This yielded 3.39 g (57%) of a white powder solid, mp 229–230 °C. <sup>1</sup>H NMR (600 MHz, DMSO-*d*<sub>6</sub>): δ 8.23–8.29 (m, 3H) ppm. <sup>19</sup>F NMR (564 MHz, DMSO-*d*<sub>6</sub>): δ –137.76 to –137.83 (m, 6F), –141.73 to –141.77 (m, 6F) ppm. FT-IR (neat):  $\tilde{\nu}$  3059, 1525, 1501, 1481, 1461, 1391, 1346, 1239, 1270, 1189, 1174, 1002, 935, 867, 840, 735, 715 698, 664, 565 cm<sup>–1</sup>. ESI MS *m/z*: 526 (100 %), 441 (10 %), 417 (20 %), 401 (5 %).

Synthesis of 2,4,6-tris(2,3,5,6-tetrafluoro-4-(1-trityl-1H-pyrazol-4-yl)phenyl)-1,3,5-triazine (**5**): A 100 mL screw cap pressure vessel was equipped with a magnetic stir bar and charged with CuCl (1.68 g, 17 mmol) and *t*-BuOK (1.91 g, 17 mmol) inside the glovebox. Dry DMF (20 mL) was added, and the vessel was sealed and vigorously stirred at 25 °C for 1 h. Next, 2,4,6-tris(2,3,5,6-tetrafluorophenyl)-1,3,5-triazine (2.63 g, 5 mmol) was added in one portion and then the reaction mixture was vigorously stirred at 25 °C for 1 h. Catalyst Pd(PPh<sub>3</sub>)<sub>4</sub> (174 mg, 0.15 mmol) was added, followed by 4-iodo-1-trityl-1H-pyrazole (8.73 g, 20 mmol). The reaction vessel was sealed, taken out of the glovebox and placed inside an oil bath preheated to 100 °C, where it was stirred vigorously for

22 h. The reaction mixture was cooled to 25 °C, diluted with DCM (400 mL) and poured into a beaker that contained 100 mL NH<sub>4</sub>OH (aq), eight spatula scoops of NH<sub>4</sub>Cl(s) and 300 mL of deionized H<sub>2</sub>O. This mixture was stirred in the beaker for 30 min. The blue aqueous layer was poured out and the organic layer was filter out through a celite pad, dried with MgSO<sub>4</sub> and was dry-absorbed on silica gel. After purification by column chromatography on silica gel (using hexanes/CH<sub>2</sub>Cl<sub>2</sub> as eluent) and evaporation of the fractions containing the product, compound **5** was obtained (5.00 g, 69%). <sup>1</sup>H NMR (400 MHz, CDCl<sub>3</sub>): δ 8.25 (s, 3H), 8.04 (s, 3H), 7.37–7.35 (m, 27H), 7.23–7.20 (m, 15H) ppm. <sup>19</sup>F NMR (376 MHz, CDCl<sub>3</sub>): δ –139.87 to –139.96 (m, 6F), –142.00 to –142.08 (m, 6F) ppm.

Synthesis of tri-tert-butyl 4,4',4''-((1,3,5-triazine-2,4,6-triyl)tris(2,3,5,6-tetrafluorobenzene-4,1-diyl))tris(1H-pyrazole-1-carboxylate) (**6**): Compound 2,4,6-tris(2,3,5,6-tetrafluoro-4-(1-trityl-1H-pyrazol-4-yl)phenyl)-1,3,5-triazine (6.60 g, 4.55 mmol) was dissolved in 100 mL of DCM in a 250 mL round bottom flask equipped with a magnetic stir bar. The following clear solution was stirred vigorously, then TFA (10 mL, 131 mmol) was added resulting in a green solution. Stirring was continued for 24 h at 25 °C. The resulting salt that precipitated was filtered off and washed with fresh DCM (3 × 50 mL). Resulting tan solid was then vacuum dried for 3 h. A 250 mL round bottom flask equipped with a magnetic stir bar was charged with the crude isolated salt (3.4 g, 4.70 mmol) and 70 mL of DCM. This suspension was cooled to 0 °C followed by the slow addition of NEt<sub>3</sub> (6 mL, 81 mmol) over 10 min. This reaction mixture was allowed to stir and maintained at a temperature of 0 °C for another 10 min and then the ice bath was removed, followed by the addition of dimethylaminopyridine (0.38 g, 3 mmol), and finally di-tert-butyl dicarbonate (7.00 g, 33 mmol) was added to the reaction mixture. The round bottom flask was then sealed with a septum and connected to a bubbler in order to visually monitor the evolution of CO<sub>2</sub> gas. The reaction mixture was stirred vigorously at 25 °C until the evolution of CO<sub>2</sub> ceased (~24 h). Upon completion, the reaction mixture was dry-absorbed on silica gel. After purification by column chromatography on silica gel (using hexanes/EtOAc as eluent) and evaporation of the fractions containing the product was obtained as a yellowish solid (1.40 g, 30% over two steps). Mp: >350 °C (decomp). <sup>1</sup>H NMR (400 MHz, CDCl<sub>3</sub>): δ 8.60 (s, 3H), 8.20 (s, 3H), 1.69 (s, 30H) ppm. <sup>19</sup>F NMR (376 MHz, CDCl<sub>3</sub>): δ –138.97 to –139.05 (m, 6F), –141.04 to –141.13 (m, 6F) ppm. FT-IR (neat):  $\tilde{\nu}$  2982, 2360, 1794,

1758, 1643, 1566, 1522, 1475, 1372, 1357, 1340, 1288, 1259, 1233, 1214, 1145, 1038, 965, 874, 839, 812, 751, 743, 707, 672, 657, 636, 596, 513 cm<sup>-1</sup>.

**Compound 1:** Tri-*tert*-butyl 4,4',4''-((1,3,5-triazine-2,4,6-triyl)tris(2,3,5,6-tetrafluorobenzene-4,1-diyl))tris(1H-pyrazole-1-carboxylate) (100 mg, 0.098 mmol) was added to a 20 mL scintillation vial. Solvents DMA (10 mL) and EtOH (10 mL) were added to the solid and the bottle was capped. The vial was sonicated for 10 min and then sealed and placed into a variable temperature oven. The oven was programmed to heat the sample at 80 °C for 1 d and then to slowly cool it to room temperature by ~4 °C/h. The resulting colourless needle crystals (43 mg, 60 %) were washed with EtOH and air-dried. Mp: >350 °C (decomp). <sup>1</sup>H NMR (600 MHz, CDCl<sub>3</sub>): δ 13.53 (s, 3H), 8.36 (s, 3H), 8.02 (s, 30H). <sup>19</sup>F NMR (564 MHz, CDCl<sub>3</sub>): δ -138.97 to -139.05 (m, 6F), -141.04 to -141.13 (m, 6F). FT-IR (neat):  $\tilde{\nu}$  3147, 2827, 1648, 1514, 1471, 1407, 1364, 1320, 1257, 1207, 1175, 1032, 989, 964, 947, 871, 865, 831, 811, 705, 658, 609, 457 cm<sup>-1</sup>.

# <sup>1</sup>H and <sup>19</sup>F NMR Spectra of Starting Materials

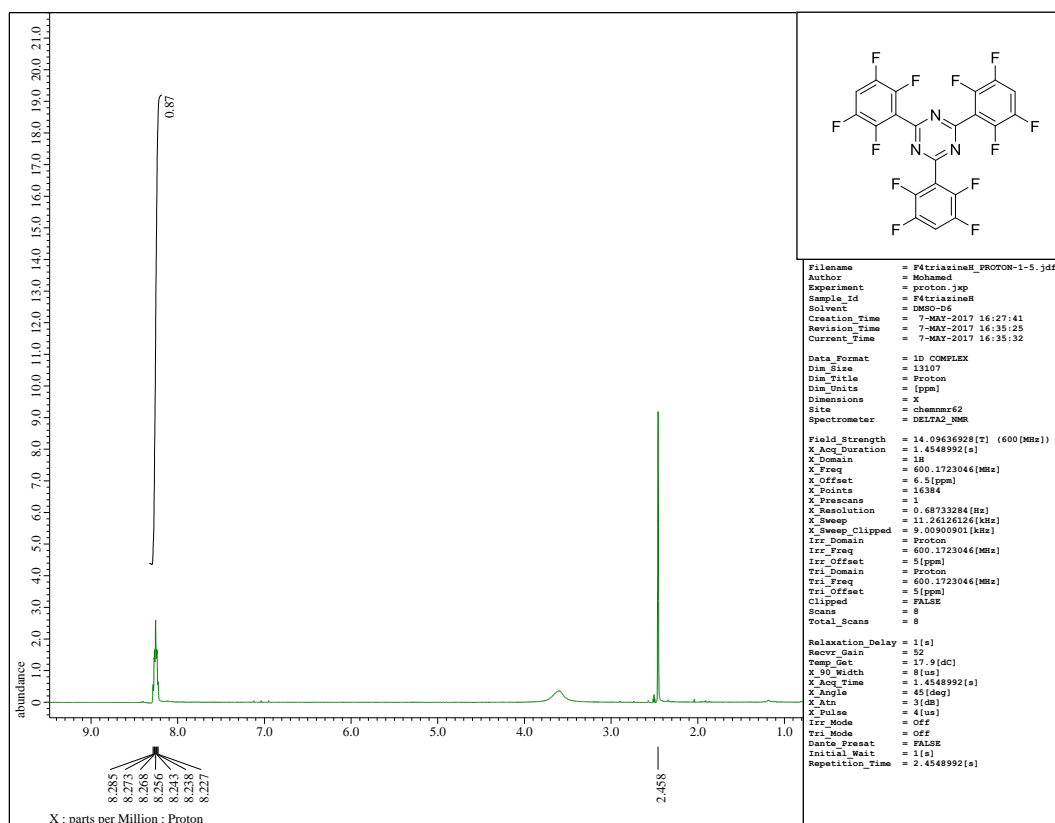

Figure 1. <sup>1</sup>H Spectrum of compound 4.

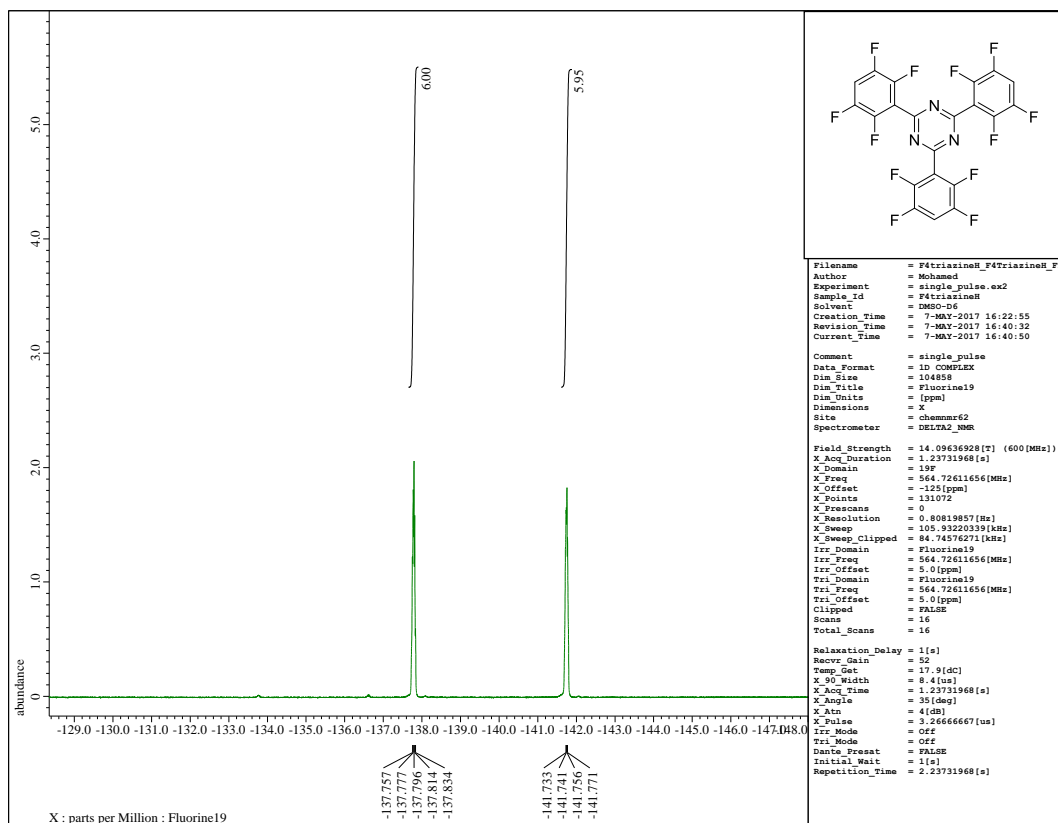

Figure 2. <sup>19</sup>F Spectrum of compound 4.



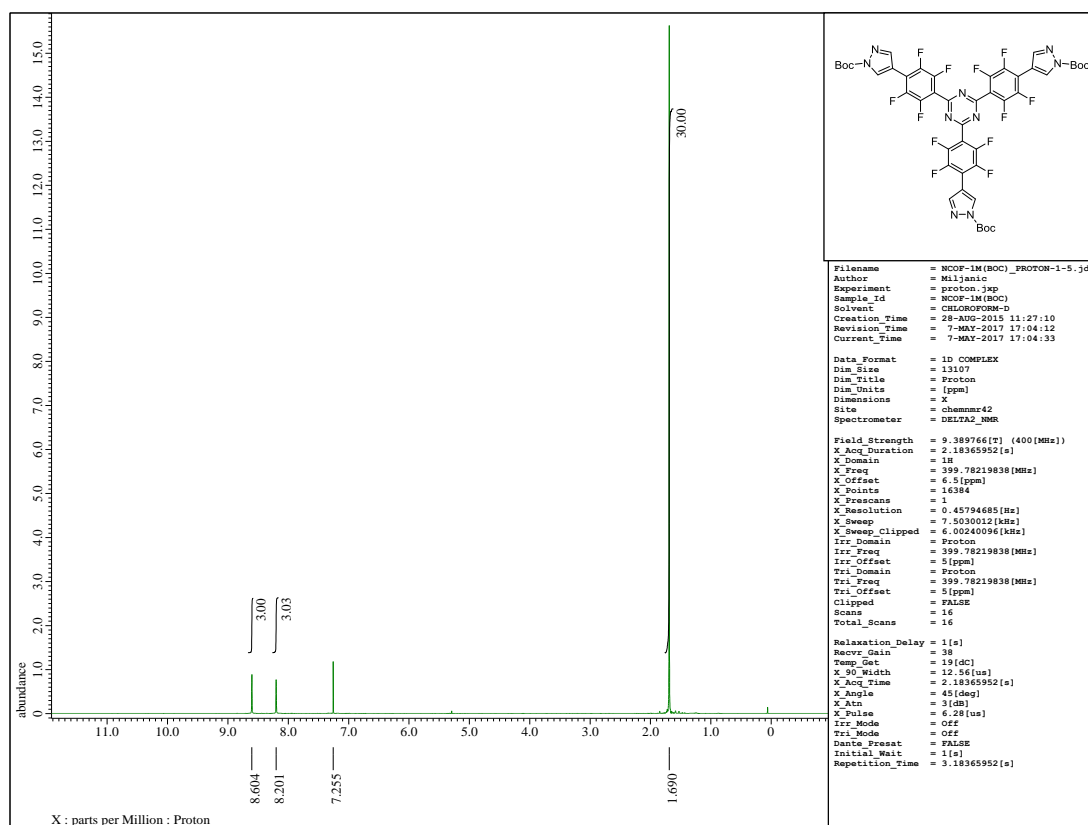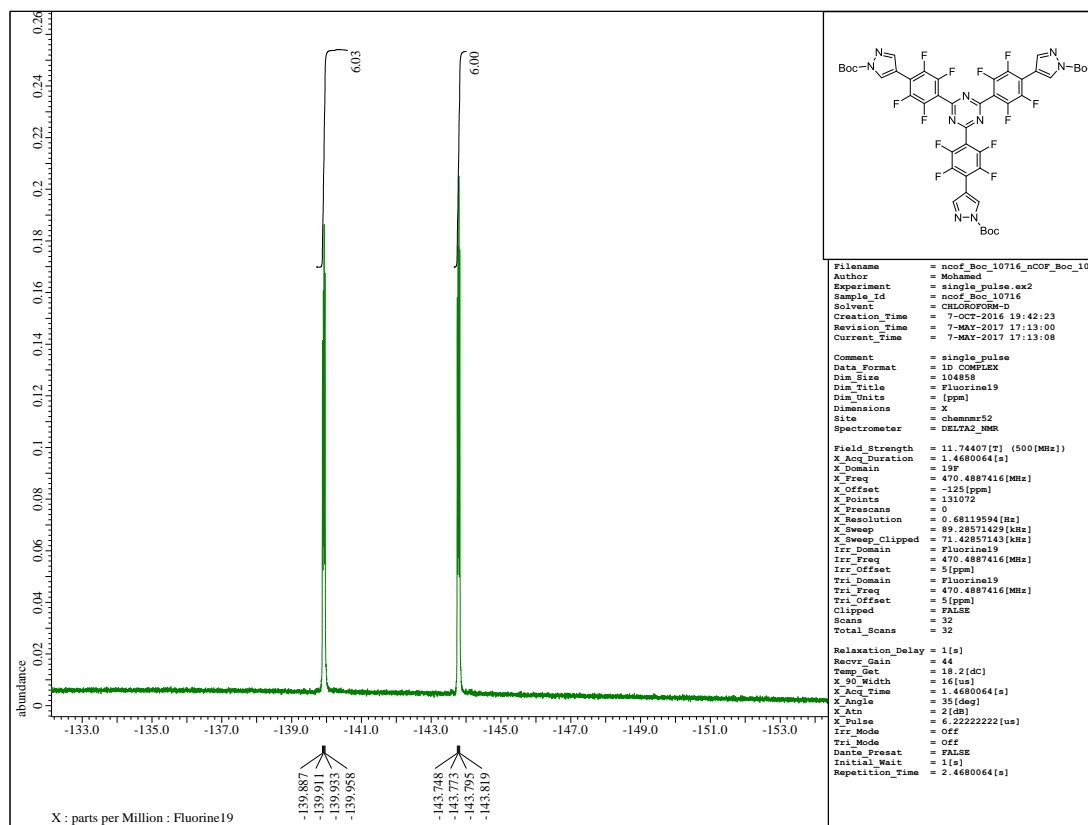



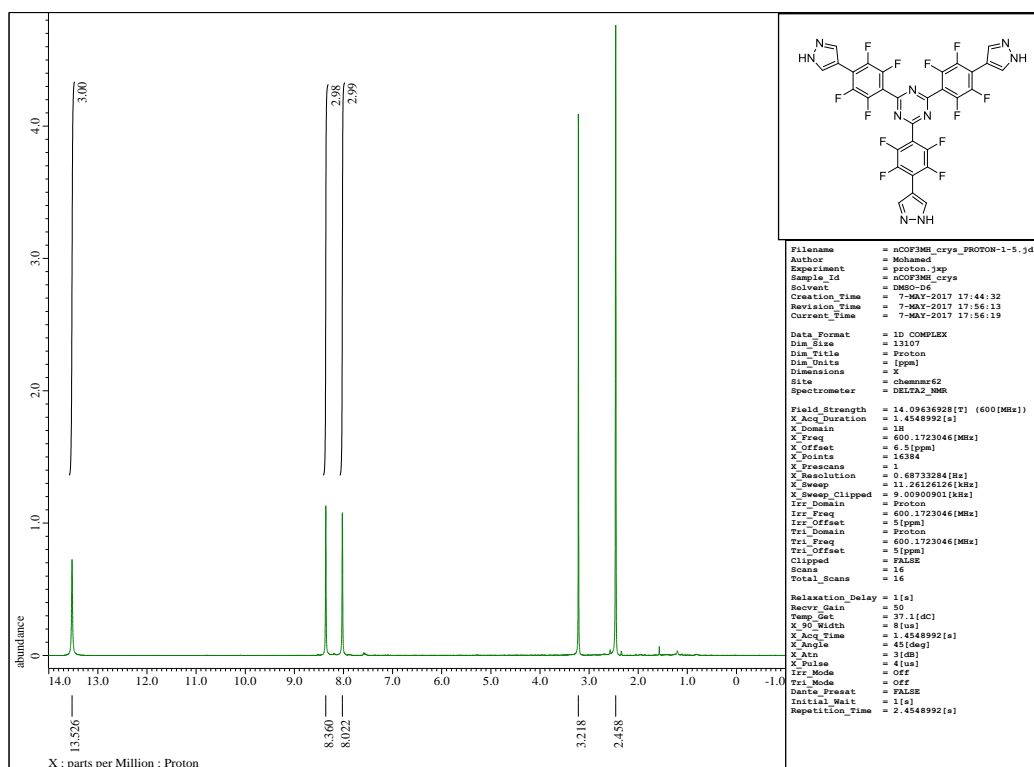

Figure 7. <sup>1</sup>H Spectrum of compound 1.

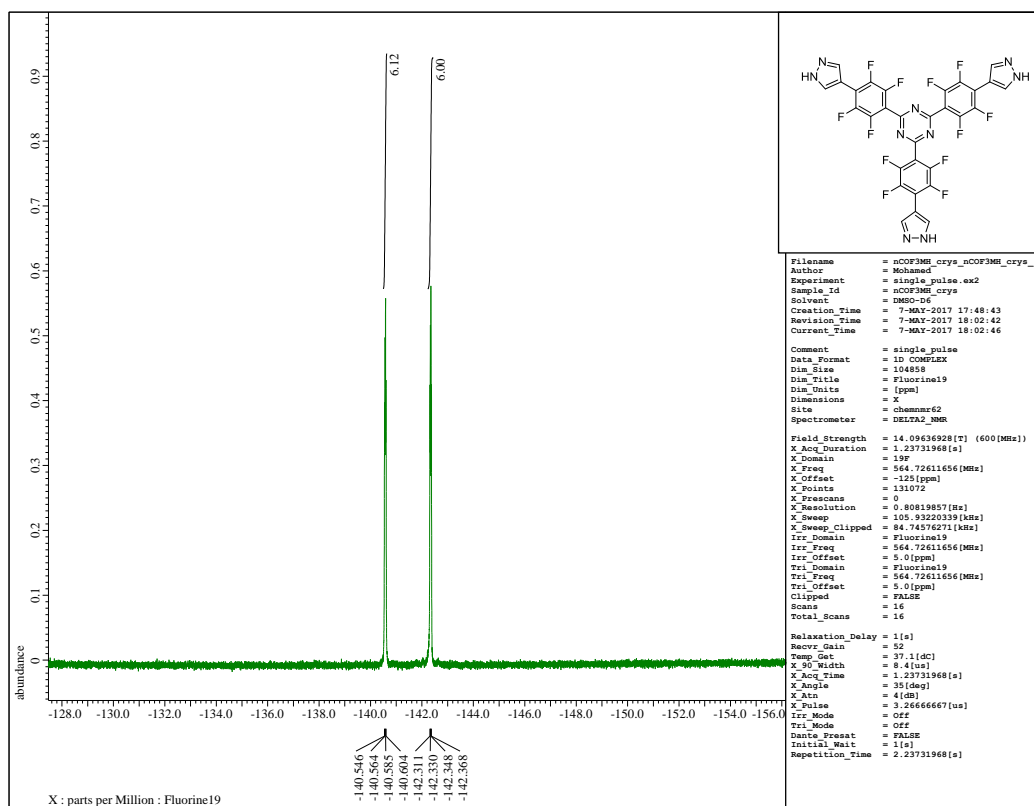

Figure 8. <sup>19</sup>F Spectrum of compound 1.

## X-ray Crystallographic Analysis of Compound 1

All measurements were performed by Dr. Xiqu Wang (UH) using a Bruker DUO platform diffractometer equipped with a 4K CCD APEX II detector and an Incoatec 30 Watt Cu microsource with compact multilayer optics. A hemisphere of data (2713 frames at 4 cm detector distance) was collected using a narrow-frame algorithm with scan widths of 0.50 % in omega and an exposure time of 25 s/frame. The data were integrated using the Bruker-Nonius SAINT program, with the intensities corrected for Lorentz factor, polarization, air absorption, and absorption due to variation in the path length through the detector faceplate. The data were scaled, and an absorption correction was applied using SADABS. Redundant reflections were averaged. Final cell constants were refined using 7541 reflections having  $I > 10\sigma(I)$ . All of the solvent sites are heavily disordered, and the identities of some solvent species are impossible to determine precisely. Most of the solvent identities and occupancies in this model are just estimates, and should not be relied on too much. They represent just one possibility out of many. Some of the solvent sites are not fully occupied, either due to some loss during crystal handling or because the disorder is so severe that some solvent locations cannot be identified. It is also quite possible that some heavily disordered water has been omitted.

### Crystal Data and Structure Refinement Parameters for Compound 1

|                                |                                      |                            |
|--------------------------------|--------------------------------------|----------------------------|
| Empirical formula              | $C_{32.42}H_9F_{12}N_{9.35}O_{1.38}$ |                            |
| Formula weight                 | 779.57                               |                            |
| Temperature                    | 100(2) K                             |                            |
| Wavelength                     | 1.54178 Å                            |                            |
| Crystal system                 | Monoclinic                           |                            |
| Space group                    | $C2/c$                               |                            |
| Unit cell dimensions           | $a = 19.1610(7)$ Å                   | $\alpha = 90^\circ$        |
|                                | $b = 34.1885(15)$ Å                  | $\beta = 110.374(3)^\circ$ |
|                                | $c = 7.1304(4)$ Å                    | $\gamma = 90^\circ$        |
| Volume                         | 4378.8(4) Å <sup>3</sup>             |                            |
| Z                              | 4                                    |                            |
| Density (calculated)           | 1.183 Mg/m <sup>3</sup>              |                            |
| Crystal size                   | 0.18 x 0.14 x 0.11 mm <sup>3</sup>   |                            |
| Reflections collected          | 15731                                |                            |
| Independent reflections        | 3937 [ $R(\text{int}) = 0.0427$ ]    |                            |
| Refinement method              | Full-matrix least-squares on $F^2$   |                            |
| Data / restraints / parameters | 3937 / 15 / 260                      |                            |

|                                        |                                         |
|----------------------------------------|-----------------------------------------|
| Goodness-of-fit on $F^2$               | 1.020                                   |
| Final $R$ indices [ $I > 2\sigma(I)$ ] | $R_1 = 0.0726$ , $wR_2 = 0.2396$        |
| $R$ indices (all data)                 | $R_1 = 0.0884$ , $wR_2 = 0.2592$        |
| Largest diff. peak and hole            | 0.617 and $-0.456$ e/ $\text{\AA}^{-3}$ |

## UV/Vis Spectroscopic Experiments

DMF and H<sub>2</sub>O of spectrophotometric grade were used in all spectral experiments. The crystals of compound **1** or compound **2** were dissolved in DMF with heating to facilitate complete dissolution of the sample. These samples were then used in the preparation of a 500  $\mu\text{M}$  stock solution. Then, a 0.06 mL sample of the stock solution was diluted to 3 mL with a specified volume of DMF and H<sub>2</sub>O under vigorous stirring yielding a final concentration of 10  $\mu\text{M}$ . The water content was changed from 0 to 98% by volume. Absorption spectra were recorded using a PerkinElmer LAMBDA 25 UV/VIS spectrometer, and the steady-state emission spectra were measured by a Horiba FluoroMax-4 spectrofluorometer. The solid-state excitation and emission spectra were measured by PTI QuantaMaster QM4 CW spectrofluorometer.

## Theoretical Calculations

Structure optimizations were carried out with the B3LYP density functional and 6-31G(d) basis set as implemented in the Gaussian 09 program package. Rigid scans of potential energy along the C9–C12 bond of the optimized structures were performed with the same conditions as the structures' optimization.

### Optimized Cartesian Coordinates for Compound 1

| Atom | X         | Y         | Z         |
|------|-----------|-----------|-----------|
| C1   | −7.469816 | −3.149044 | 0.308842  |
| H2   | −7.710563 | −2.270936 | 0.886171  |
| C3   | −6.212166 | −3.512866 | −0.264658 |
| C4   | −6.481129 | −4.728984 | −0.894511 |
| H5   | −5.852371 | −5.39605  | −1.460003 |
| C6   | −4.939418 | −2.795074 | −0.214482 |
| C7   | −4.764801 | −1.608369 | 0.516962  |
| C8   | −3.557851 | −0.920656 | 0.560862  |
| C9   | −2.422182 | −1.380109 | −0.120591 |
| C10  | −2.578999 | −2.565837 | −0.851454 |
| C11  | −3.793084 | −3.237716 | −0.896145 |
| C12  | −1.132374 | −0.652628 | −0.065593 |
| C13  | 0.009493  | 1.295452  | 0.000863  |
| C14  | 0.020424  | 2.776614  | −0.000528 |
| C15  | 1.018287  | 3.510393  | −0.65722  |
| C16  | 1.020161  | 4.900132  | −0.66133  |
| C17  | 0.041428  | 5.665428  | −0.005503 |
| C18  | 0.050878  | 7.127419  | −0.004866 |
| C19  | 1.028882  | 8.017441  | −0.547396 |
| H20  | 1.945524  | 7.769801  | −1.058201 |
| F21  | −5.786255 | −1.093696 | 1.227423  |
| F22  | −3.502424 | 0.178634  | 1.319089  |
| F23  | −1.569813 | −3.065621 | −1.572512 |
| F24  | −3.845471 | −4.358149 | −1.646153 |
| F25  | 1.981718  | 2.891656  | −1.346524 |
| F26  | 2.010181  | 5.506678  | −1.343413 |
| N27  | −8.414637 | −4.045017 | 0.058841  |
| N28  | −7.785178 | −4.993505 | −0.67182  |
| H29  | −8.311433 | −5.795411 | −0.985945 |
| N30  | 0.708958  | 9.290492  | −0.360701 |
| N31  | −1.179589 | 0.685926  | −0.096524 |
| N32  | −0.010609 | −1.382479 | 0.001919  |
| C33  | 7.381445  | −3.235489 | −0.303842 |
| H34  | 7.671592  | −2.374482 | −0.882282 |
| C35  | 6.161847  | −3.599534 | 0.268893  |

|     |           |           |           |
|-----|-----------|-----------|-----------|
| C36 | 6.449796  | -4.848952 | 0.900547  |
| H37 | 5.781116  | -5.48269  | 1.460544  |
| C38 | 4.897997  | -2.865957 | 0.222596  |
| C39 | 4.738732  | -1.676193 | -0.507959 |
| C40 | 3.5438    | -0.970697 | -0.555437 |
| C41 | 2.401089  | -1.415589 | 0.124747  |
| C42 | 2.54154   | -2.603233 | 0.855243  |
| C43 | 3.746201  | -3.294351 | 0.903529  |
| C44 | 1.121981  | -0.669558 | 0.069415  |
| C45 | -0.967791 | 3.525869  | 0.65404   |
| C46 | -0.947659 | 4.914158  | 0.651713  |
| C47 | -0.90709  | 7.986527  | 0.535716  |
| H48 | -1.833401 | 7.792237  | 1.04994   |
| F49 | 5.772922  | -1.176871 | -1.21587  |
| F50 | 3.505357  | 0.129428  | -1.313864 |
| F51 | 1.524475  | -3.088709 | 1.574442  |
| F52 | 3.778486  | -4.412121 | 1.653915  |
| F53 | -1.940432 | 2.923512  | 1.345169  |
| F54 | -1.930315 | 5.541745  | 1.330458  |
| N55 | 8.25429   | -4.217936 | 0.001372  |
| H56 | 9.228539  | -4.27553  | -0.25592  |
| N57 | 7.712556  | -5.217301 | 0.734588  |
| N58 | -0.472021 | 9.241094  | 0.297095  |
| H59 | -0.923178 | 10.106673 | 0.553816  |
| N60 | 1.189168  | 0.668218  | 0.099191  |

Rigid scans of potential energy along the C9–C12 of the optimized structures of compound 1

| Dihedral angle C10–C9–C12–N32 (°) | Total Energy (kcal mol <sup>-1</sup> ) |
|-----------------------------------|----------------------------------------|
| 1.48955                           | -1781667.924                           |
| 11.48955                          | -1781668.235                           |
| 21.48955                          | -1781669.055                           |
| 31.48955                          | -1781669.826                           |
| 41.48955                          | -1781670.046                           |
| 51.48955                          | -1781669.796                           |
| 61.48955                          | -1781669.199                           |
| 71.48955                          | -1781668.598                           |
| 81.48955                          | -1781668.208                           |
| 91.48955                          | -1781668.107                           |
| 101.48955                         | -1781668.354                           |
| 111.48955                         | -1781668.871                           |
| 121.48955                         | -1781669.579                           |
| 131.48955                         | -1781670.176                           |
| 141.48955                         | -1781670.422                           |
| 151.48955                         | -1781670.098                           |
| 161.48955                         | -1781669.247                           |

|           |              |
|-----------|--------------|
| 171.48955 | -1781668.326 |
| 181.48955 | -1781667.883 |
| 191.48955 | -1781668.197 |
| 201.48955 | -1781669.043 |
| 211.48955 | -1781669.773 |
| 221.48955 | -1781670.026 |
| 231.48955 | -1781669.723 |
| 241.48955 | -1781669.145 |
| 251.48955 | -1781668.571 |
| 261.48955 | -1781668.183 |
| 271.48955 | -1781668.105 |
| 281.48955 | -1781668.343 |
| 291.48955 | -1781668.866 |
| 301.48955 | -1781669.579 |
| 311.48955 | -1781670.219 |
| 321.48955 | -1781670.462 |
| 331.48955 | -1781670.143 |
| 341.48955 | -1781669.289 |
| 351.48955 | -1781668.37  |
| 361.48955 | -1781667.924 |

Optimized Cartesian Coordinates for Compound 2

| Atom | X         | Y         | Z         |
|------|-----------|-----------|-----------|
| C1   | -0.972931 | 8.094919  | -0.734778 |
| H2   | -0.154899 | 8.072789  | -1.435141 |
| C3   | -1.592766 | 7.083117  | -0.001129 |
| C4   | -2.603106 | 7.775888  | 0.734297  |
| H5   | -3.318379 | 7.368811  | 1.430814  |
| C6   | -1.272612 | 5.655229  | 0.002501  |
| C7   | -0.251366 | 5.102707  | -0.787594 |
| C8   | 0.054249  | 3.748356  | -0.789245 |
| C9   | -0.633723 | 2.821293  | 0.004537  |
| C10  | -1.652554 | 3.365859  | 0.796577  |
| C11  | -1.959486 | 4.721266  | 0.794815  |
| C12  | -0.307966 | 1.372418  | 0.005217  |
| C13  | 1.026199  | 0.94473   | 0.004866  |
| H14  | 1.821508  | 1.677848  | 0.004688  |
| C15  | 1.343933  | -0.419873 | 0.00494   |
| C16  | 0.30643   | -1.361475 | 0.005175  |
| H17  | 0.543715  | -2.416802 | 0.005492  |
| C18  | -1.0342   | -0.954359 | 0.00526   |
| C19  | -1.330817 | 0.41495   | 0.005482  |
| H20  | -2.363365 | 0.737197  | 0.006044  |
| C21  | 2.761607  | -0.862094 | 0.004067  |
| C22  | 3.220687  | -1.920915 | -0.790299 |

|     |           |           |           |
|-----|-----------|-----------|-----------|
| C23 | 4.546429  | -2.333298 | -0.788774 |
| C24 | 5.535306  | -1.725812 | 0.002157  |
| C25 | 5.069734  | -0.664472 | 0.794992  |
| C26 | 3.742446  | -0.252693 | 0.796848  |
| C27 | 6.931963  | -2.16253  | -0.00122  |
| C28 | 7.497474  | -3.207525 | -0.732237 |
| H29 | 7.068451  | -3.906831 | -1.430153 |
| C30 | 8.03772   | -1.632362 | 0.732124  |
| H31 | 8.04373   | -0.807345 | 1.426254  |
| C32 | -2.126409 | -1.960563 | 0.004261  |
| C33 | -3.272568 | -1.828002 | -0.790503 |
| C34 | -4.293483 | -2.768925 | -0.788828 |
| C35 | -4.263022 | -3.928892 | 0.002331  |
| C36 | -3.111372 | -4.057112 | 0.795543  |
| C37 | -2.090106 | -3.114599 | 0.797165  |
| C38 | -5.340336 | -4.919243 | -0.00121  |
| C39 | -6.521723 | -4.892451 | -0.742696 |
| H40 | -6.906152 | -4.177703 | -1.450904 |
| C41 | -5.441036 | -6.135354 | 0.742139  |
| H42 | -4.735999 | -6.546971 | 1.446379  |
| N43 | 8.808714  | -3.232241 | -0.411407 |
| H44 | 9.514032  | -3.865031 | -0.758639 |
| N45 | 9.166799  | -2.281277 | 0.480284  |
| N46 | -1.606746 | 9.242878  | -0.413224 |
| H47 | -1.412707 | 10.169875 | -0.761788 |
| N48 | -2.606803 | 9.077947  | 0.481378  |
| N49 | -7.202003 | -6.012539 | -0.417857 |
| H50 | -8.09969  | -6.309728 | -0.770423 |
| N51 | -6.565786 | -6.790314 | 0.486523  |
| F52 | 0.476873  | 5.896244  | -1.600842 |
| F53 | 1.045421  | 3.339926  | -1.602789 |
| F54 | -2.373045 | 2.572897  | 1.610241  |
| F55 | -2.956651 | 5.12226   | 1.606651  |
| F56 | 2.371757  | -2.574438 | -1.604726 |
| F57 | 4.869736  | -3.359997 | -1.60291  |
| F58 | 3.415764  | 0.767062  | 1.611312  |
| F59 | 5.915442  | -0.002034 | 1.607466  |
| F60 | -5.34413  | -2.53454  | -1.602871 |
| F61 | -3.412967 | -0.766144 | -1.605215 |
| F62 | -1.043806 | -3.342477 | 1.611596  |
| F63 | -2.961622 | -5.120581 | 1.608398  |

Rigid scans of potential energy along the C9–C12 of the optimized structures of compound **2**

| Dihedral angle C10–C9–C12–C19(°) | Total Energy (kcal mol <sup>-1</sup> ) |
|----------------------------------|----------------------------------------|
| 2.1806                           | –1751472.837                           |
| 12.1806                          | –1751474.767                           |
| 22.1806                          | –1751477.555                           |
| 32.1806                          | –1751479.404                           |
| 42.1806                          | –1751479.953                           |
| 52.1806                          | –1751479.602                           |
| 62.1806                          | –1751478.940                           |
| 72.1806                          | –1751478.279                           |
| 82.1806                          | –1751477.861                           |
| 92.1806                          | –1751477.739                           |
| 102.1806                         | –1751477.910                           |
| 112.1806                         | –1751478.363                           |
| 122.1806                         | –1751478.975                           |
| 132.1806                         | –1751479.513                           |
| 142.1806                         | –1751479.506                           |
| 152.1806                         | –1751478.345                           |
| 162.1806                         | –1751475.937                           |
| 172.1806                         | –1751473.379                           |
| 182.1806                         | –1751472.774                           |
| 192.1806                         | –1751474.726                           |
| 202.1806                         | –1751477.513                           |
| 212.1806                         | –1751479.357                           |
| 222.1806                         | –1751479.930                           |
| 232.1806                         | –1751479.589                           |
| 242.1806                         | –1751478.945                           |
| 252.1806                         | –1751478.296                           |
| 262.1806                         | –1751477.885                           |
| 272.1806                         | –1751477.771                           |
| 282.1806                         | –1751477.949                           |
| 292.1806                         | –1751478.412                           |
| 302.1806                         | –1751479.025                           |
| 312.1806                         | –1751479.558                           |
| 322.1806                         | –1751479.540                           |
| 332.1806                         | –1751478.417                           |
| 342.1806                         | –1751475.987                           |
| 352.1806                         | –1751473.443                           |
| 362.1806                         | –1751472.837                           |



## Variable Temperature $^{19}\text{F}$ NMR Studies

To evaluate intramolecular rotation and possible aggregation at low temperatures, we performed variable temperature  $^{19}\text{F}$  NMR spectroscopic studies on **1** and **2**. To simplify the analysis, these studies were performed with simultaneous irradiation of one of the two peaks (labeled as **L** and **R** based on their position in the spectra), which caused decoupling and the other peak to appear as a singlet. All spectra were taken at concentrations of  $0.3 \text{ mg mL}^{-1}$  (for both **1** and **2**) in  $\text{DMF-}d_7$ . While all the peaks broaden at low temperature due to lowered solubility and possible aggregation, there is no significant difference in this behavior between compounds **1** and **2**, nor peaks **L** and **R**.

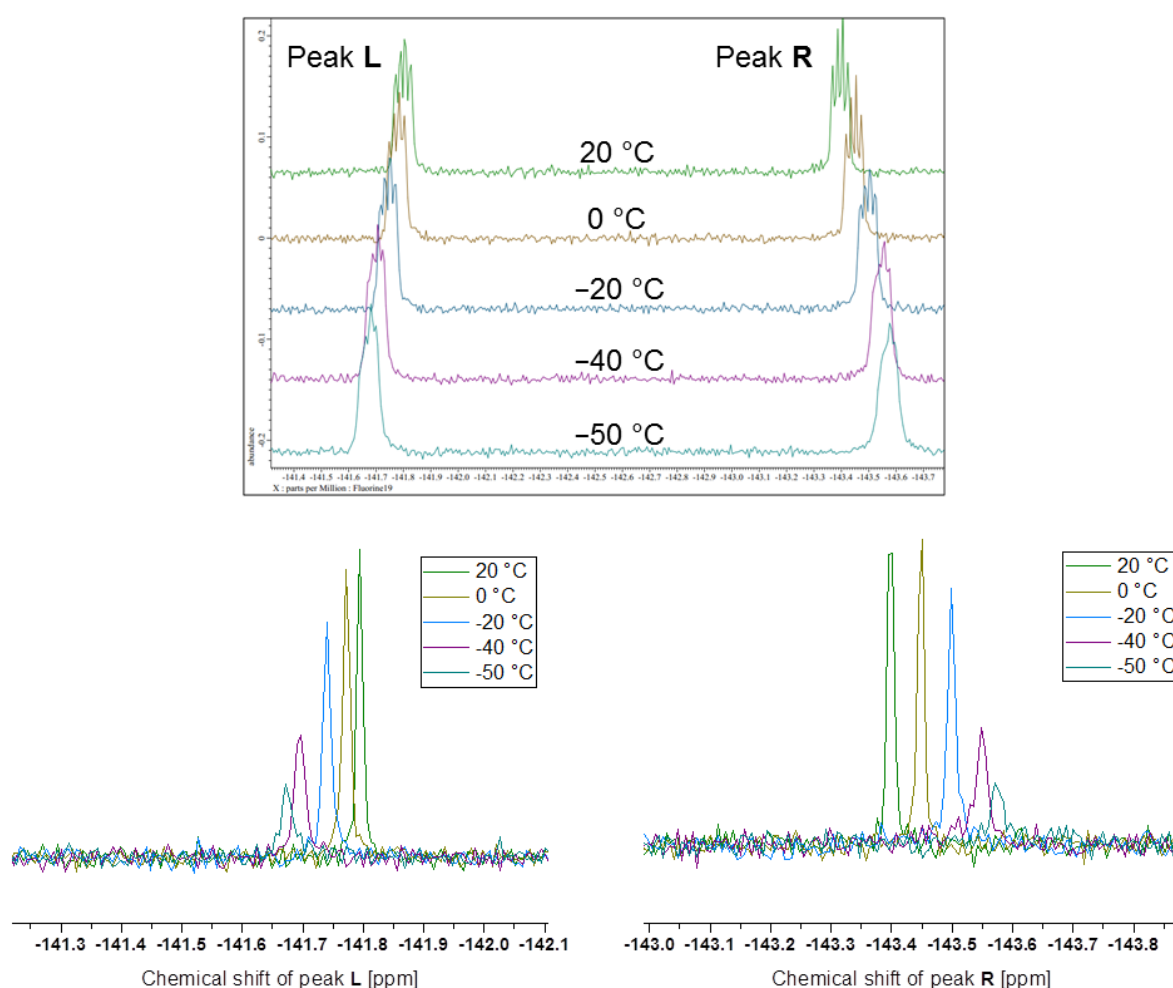

**Figure 9.** Variable temperature  $^{19}\text{F}$  spectrum of compound **1**: comparison of spectra with the lowering of the temperature (top), and the shapes and positions of peaks L (bottom left) and R (bottom right) following decoupling.

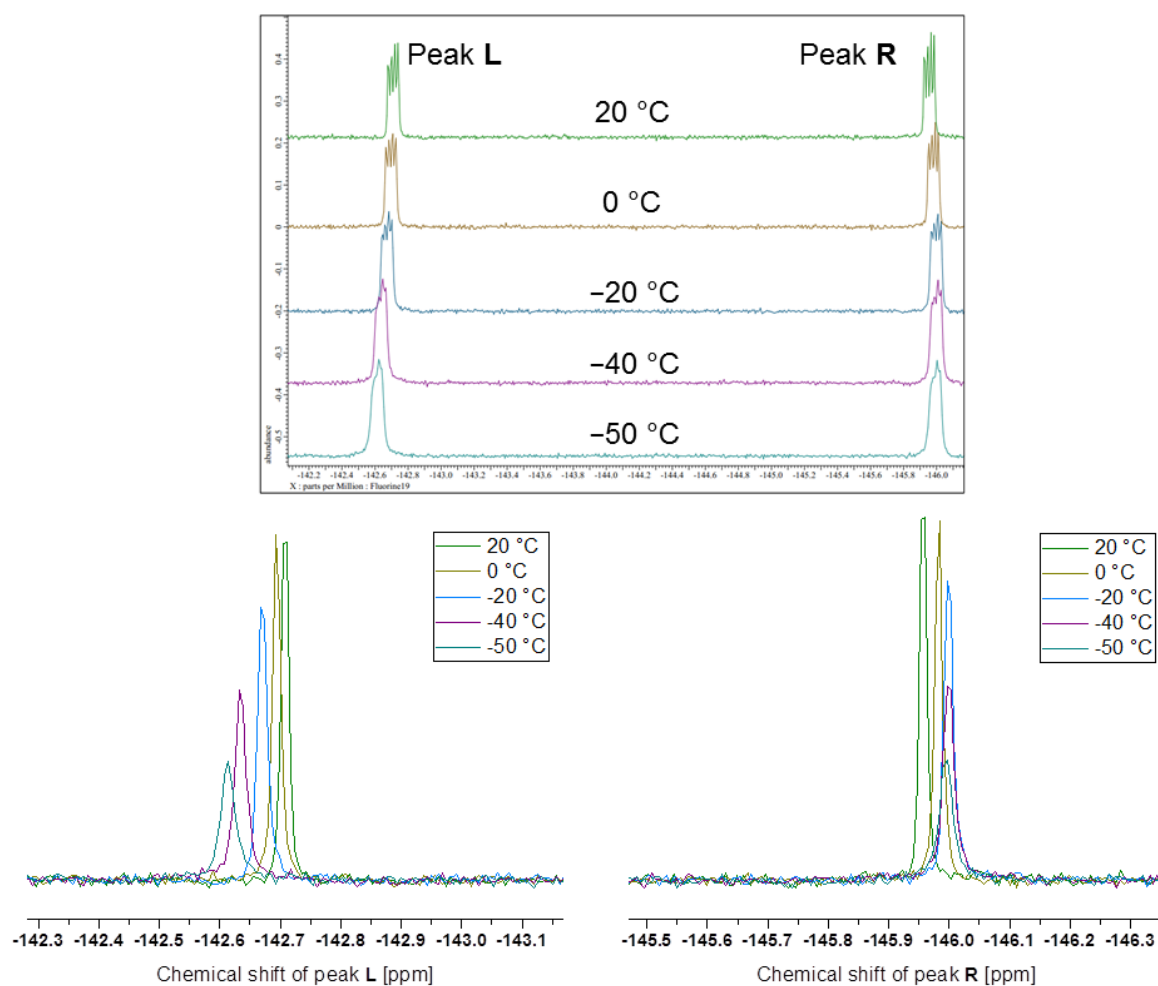

**Figure 10.** Variable temperature  $^{19}\text{F}$  spectrum of compound **2**: comparison of spectra with the lowering of the temperature (top), and the shapes and positions of peaks L (bottom left) and R (bottom right) following decoupling.

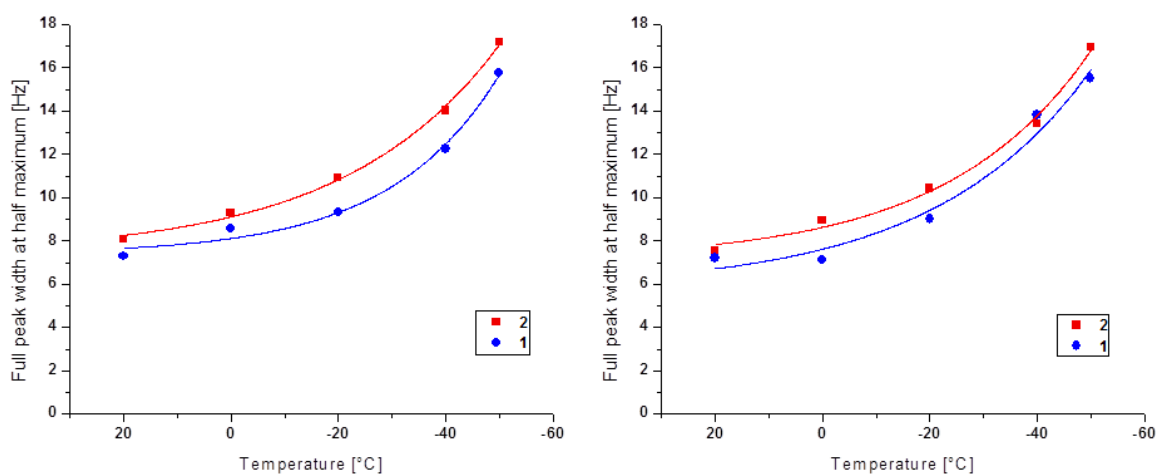

**Figure 11.** Comparison of full peak widths at half maximum in Hz for peaks L (left) and R (right) in compounds **1** and **2**.

## References

- [1] T. Chen, I. Popov, W. Kaveevivitchai, Y. Chuang, Y. Chen, O. Daugulis, A. J. Jacobson and O. Š. Miljanić, *Nat. Commun.*, 2014, **5**, doi: 10.1038/ncomms6131.
- [2] V. I. Krasnov and V. E. Platonov, *Russ. J. Org. Chem.*, 1993, **29**, 895–896.
